# Supplementary material for: Self-assembly and characterization of hydrogen-bonding one-dimensional nanostructure based on 9,10-anthraquinone derivatives
Source: Royal Society of Chemistry journal article supplement (doi:10.1039/c1ce05286a), 2011-01-01
Supplement: c1ce05286a.pdf [file c1ce05286a.pdf]

# Self-Assembly and Characterization of Hydrogen-Bonding One-dimension Nanostructure Based on 9,10-anthraquinone derivative

*Xiuhua Wang,\*<sup>a</sup> Sufan Wang,\*<sup>a</sup> Mingwang Shao\*<sup>a,b</sup>, Li Liu<sup>a</sup> and Shifeng Li<sup>a</sup>*

## Supporting Information

The detailed index information about the crystal structure of EAQ nanoribbons.

RECIPROCAL PARAMETERS AND NOT ON THE DIRECT PAPER PARAMETERS.

A= 17.48976 B= 7.12570 C= 8.08955

ALFA= 90.0000 BETA= 98.3486 GAMMA= 90.0000

VOLUME OF THE CONVENTIONAL CELL= 997.49

| H  | K | L | SST-OBS  | SST-CALC | DELTA     | 2TH-OBS | 2TH-CALC | D-OBS   | FREE PARAM. |
|----|---|---|----------|----------|-----------|---------|----------|---------|-------------|
| 1  | 0 | 0 | 0.001982 | 0.001982 | 0.000000  | 5.103   | 5.103    | 17.3031 | 298         |
| 2  | 0 | 0 | 0.007927 | 0.007926 | 0.000001  | 10.216  | 10.216   | 8.6515  | 1000        |
| -1 | 0 | 1 | 0.010010 | 0.010000 | 0.000010  | 11.484  | 11.478   | 7.6992  | 160         |
| 0  | 1 | 0 | 0.011731 | 0.011686 | 0.000045  | 12.436  | 12.412   | 7.1119  | 55          |
| -2 | 0 | 1 | 0.014600 | 0.014700 | -0.000101 | 13.880  | 13.928   | 6.3751  | 114         |
| 3  | 0 | 0 | 0.017915 | 0.017834 | 0.000081  | 15.384  | 15.349   | 5.7550  | 59          |
| 4  | 0 | 0 | 0.031710 | 0.031705 | 0.000005  | 20.515  | 20.513   | 4.3258  | 23          |
| 1  | 0 | 2 | 0.041529 | 0.041519 | 0.000010  | 23.517  | 23.514   | 3.7799  | 108         |
| -3 | 0 | 2 | 0.047468 | 0.047419 | 0.000049  | 25.168  | 25.155   | 3.5356  | 76          |
| 2  | 0 | 2 | 0.049913 | 0.049952 | -0.000039 | 25.819  | 25.829   | 3.4479  | 77          |
| 0  | 2 | 1 | 0.056100 | 0.056006 | 0.000094  | 27.402  | 27.379   | 3.2522  | 32          |
| -3 | 2 | 1 | 0.069994 | 0.070108 | -0.000114 | 30.682  | 30.708   | 2.9116  | 32          |
